# Supplementary material for: Health Care Trainees’ and Professionals’ Perceptions of ChatGPT in Improving Medical Knowledge Training: Rapid Survey Study
Source: PubMed Central journal article supplement (PMC10620632; doi:10.2196/49385), 2023-10-18
Supplement: jmir_v25i1e49385_app3.pdf [file jmir_v25i1e49385_app3.pdf]

# chat-GPT輔助學習評估

感謝您協助填寫本問卷，以助於我們了解學生對於chat-GPT用於輔助新知識學習的認知，本問卷設計以生物資訊知識學為範例，您可以自行選擇是否填寫此問卷，本問卷之資料僅做學術研究使用不另做其他用途，問卷資料將由計畫主持人以電子檔形式密碼保存於雲端，以確保資料保密不外流。請觀看2分鐘影片後填寫問卷，問卷填寫僅需花費約2分鐘，感謝您參與本研究。

如有任何問題歡迎聯絡計畫主持人：

國防醫學院公衛系 張語恬 老師

02-87923100#18454

greengarden720925@gmail.com

\* 表示必填問題

## 1. 電子郵件 \*

---

請觀賞約2分鐘的影片後填寫問卷，感謝您

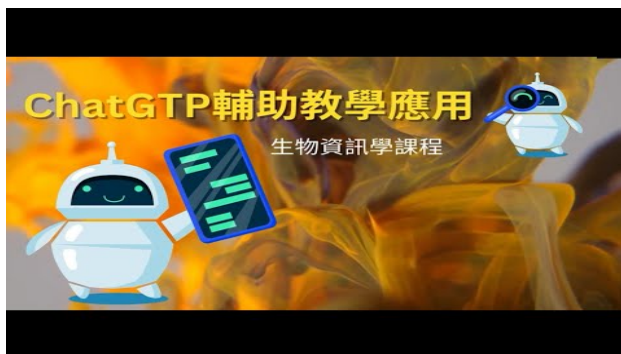

<http://youtube.com/watch?v=6BD0Nerrgl8>

## 基本資料

## 2. 請問您的身分是 \*

單選。

大學部學生

碩士生

博士生

3。 性別 \*

單選。

生理男

生理女

4。 年齡 ( 年 ) \*

---

## 一、知識獲得

5。 我認為使用chat-GPT輔助教學相較於傳統老師授課，能使我獲得更多課程相關的知識 \*

單選。

---

非常不同意

---

1

---

2

---

3

---

4

---

5

---

非常同意

---

6。 我認為使用chat-GPT輔助教學相較於傳統老師授課，能使我更容易理解程式碼內容 \*

單選。

\_\_\_\_\_

非常不同意

\_\_\_\_\_

1

\_\_\_\_\_

2

\_\_\_\_\_

3

\_\_\_\_\_

4

\_\_\_\_\_

5

\_\_\_\_\_

非常同意

\_\_\_\_\_

7。 我認為使用chat-GPT輔助教學相較於傳統老師授課，能使我更容易撰寫出我想要的分析語法 \*

單選。 \_\_\_\_\_

非常不同意

\_\_\_\_\_

1

\_\_\_\_\_

2

\_\_\_\_\_

3

\_\_\_\_\_

4

\_\_\_\_\_

5

\_\_\_\_\_

非常同意

\_\_\_\_\_

二、學習動機與成效

8。 我認為使用chat-GPT輔助教學相較於傳統老師授課，能使我更願意自主學習程式語言 \*

單選。

\_\_\_\_\_

非常不同意

\_\_\_\_\_

1

\_\_\_\_\_

2

\_\_\_\_\_

3

\_\_\_\_\_

4

\_\_\_\_\_

5

\_\_\_\_\_

非常同意

\_\_\_\_\_

9。 我認為使用chat-GPT輔助教學相較於傳統老師授課，能更提升我學習程式語言的動機 \*

單選。

\_\_\_\_\_

非常不同意

\_\_\_\_\_

1

\_\_\_\_\_

2

\_\_\_\_\_

3

\_\_\_\_\_

4

\_\_\_\_\_

5

\_\_\_\_\_

非常同意

\_\_\_\_\_

10。 我認為使用chat-GPT輔助教學相較於傳統老師授課，能使我更理解程式語法中複雜難懂的部分 \*

單選。 \_

\_\_\_\_\_

1

\_\_\_\_\_

2

\_\_\_\_\_

3

\_\_\_\_\_

4

\_\_\_\_\_

5

\_\_\_\_\_

\_\_\_\_\_

11。 我認為使用chat-GPT輔助教學相較於傳統老師授課，能更增加我在非課堂時練習 \*  
語法撰寫的動力

單選。 \_

- \_\_\_\_\_
- 1
- 2
- 3
- 4
- 5
- \_\_\_\_\_
- \_\_\_\_\_



12。 我認為使用chat-GPT輔助教學相較於傳統老師授課，能更有助於我課前預習的動機與理解 \*

單選。 \_\_\_\_\_

非常不同意

\_\_\_\_\_

1

\_\_\_\_\_

2

\_\_\_\_\_

3

\_\_\_\_\_

4

\_\_\_\_\_

5

\_\_\_\_\_

非常同意

\_\_\_\_\_

13。 我認為使用chat-GPT輔助教學相較於傳統老師授課，我更有信心能學好老師教授的知識與技能 \*

單選。 \_\_\_\_\_

非常不同意

\_\_\_\_\_

1

\_\_\_\_\_

2

\_\_\_\_\_

3

\_\_\_\_\_

4

\_\_\_\_\_

5

\_\_\_\_\_

非常同意

\_\_\_\_\_

14。 我認為使用chat-GPT輔助教學相較於傳統老師授課，我更有自信能學好程式語法與資料分析 \*

單選。

非常不同意

1

2

3

4

5

非常同意

三、滿意度

15。 我認為使用chat-GPT輔助教學相較於傳統老師授課更讓我滿意 \*

單選。 \_\_\_\_\_

非常不同意

1

2

3

4

5

非常同意

16。 我認為使用chat-GPT輔助教學提供的資訊符合個人所需且令人滿意 \*

單選。 \_\_\_\_\_

非常不同意

1

2

3

4

5

非常同意

其他

17。 您對 chat-GPT 應用於程式語言學習是否有其他想法或建議？請暢所欲言 \*

---

---

---

---

---

---

Google 並未認可或建立這項內容。

Google 表單
